# Supplementary material for: Improving Recognition Accuracy of Pesticides in Groundwater by Applying TrAdaBoost Transfer Learning Method
Source: MDPI journal article supplement (doi:10.3390/s23083856), 2023-04-10
Supplement: s1 [file s1]

# Supporting Information for: Improving Recognition Accuracy of Pesticides in Groundwater by Applying TrAdaBoost Transfer Learning Method

Donghui Chen <sup>1,2,3</sup>, Bingyang Wang <sup>1,2,3</sup>, Xiao Yang <sup>1,2,3</sup>, Xiaohui Weng <sup>3,4</sup> and Zhiyong Chang <sup>1,2,3,\*</sup>

<sup>1</sup> Key Laboratory of Bionic Engineering, Ministry of Education, Jilin University, Changchun 130022, China

<sup>2</sup> College of Biological and Agricultural Engineering, Jilin University, Changchun 130022, China

<sup>3</sup> Weihai Institute for Bionics, Jilin University, Weihai 264401, China

<sup>4</sup> School of Mechanical and Aerospace Engineering, Jilin University, Changchun 130022, China

\* Correspondence: zychang@jlu.edu.cn

**Table S1.** The volatile compounds in pesticide samples.

| chlorothalonil        |                             | chlorpyrifos          |                       | malathion             |                                                                  | lindane |
|-----------------------|-----------------------------|-----------------------|-----------------------|-----------------------|------------------------------------------------------------------|---------|
| Decane                | Tetradecane                 | Ethylbenzene          | Chlorpyrifos          | Ethylbenzol           | Azulene                                                          | Toluene |
| Tridecane             | Ditan                       | Mellitene             | Chlorobenzene         | Isocumene             | m-Ethylcumene                                                    | Lindane |
| Dodecane              | Dihydrocurcumene            | o-Ethyltoluene        | p-Ethylcumene         | p-Ethyltoluene        | 4-Ethyl-m-xylene                                                 |         |
| Naphthalene           | Mellitene                   | Isobutylbenzene       | 3-o-Tolyl-1-butene    | 2-Ethyltoluene        | 2,5-Diethyltoluene                                               |         |
| Hexylcyclohexane      | 2-Isopropyl-naphthalene     | 2-Phenylbutane        | 4,4'-Dimethylbiphenyl | p-Cymene              | p-Ethylcumene                                                    |         |
| 2,4,5-Trimethylcumene | 2,6-Diisopropyl-naphthalene | Hemimellitol          | 2-Methylnaphthalene   | Indane                | 4,6-Dimethylindan                                                |         |
| 2-Methyldodecane      | 1,3,5-Triisopropylbenzene   | p-Cymene              | 2,5-Diethyltoluene    | 3-Propyltoluene       | 2-Methylnaphthalene                                              |         |
| 4,7-Dimethylindan     | trans-Verbenyl isovalerate  | Indane                | 3,4-Dimethylcumene    | o-Diethylbenzene      | Trimethyl thiono<br>-phosphate<br>Methyl phosphoro<br>-dithioate |         |
| 7-Methyltridecane     | Pyrocatechitol              | 2-Propyltoluene       |                       | 4-Ethyl-o-xylene      |                                                                  |         |
| Murolane              | (Z)-7-Hexadecenal           | 1-Methylindan         |                       | 2-Propyltoluene       |                                                                  |         |
| 1-Tridecene           | 4,7-Dimethylbenzofuran      | 2-Allyltoluene        |                       | o-Cymene              |                                                                  |         |
| 3-Methylundecane      | Landrin                     | 3,5-Diethyltoluene    |                       | 2-Phenylpentane       |                                                                  |         |
| 1,3-Di-iso-propyl     | Phthalodinitrile            | (2-Methylcyclopropyl) |                       | (2-Methylcyclopropyl) |                                                                  |         |
| -5-ethylbenzene       |                             | -benzene              |                       | -benzene              |                                                                  |         |
| Dicyclohexyl          | Cetyl chloride              | 4-Ethyl-m-xylene      |                       | 2-Allyltoluene        |                                                                  |         |
| Heptylcyclohexane     | Chlorothalonil              | p-Ethyltoluene        |                       | 3,5-Diethyltoluene    |                                                                  |         |
| 2-Methyltridecane     | 2,4-Di-tert-butylphenol     | 2-Ethyl-naphthalene   |                       | 2-p-Tolylbutane       |                                                                  |         |
| 3-Methyltridecane     |                             | Azulene               |                       | 2,4-Diethyltoluene    |                                                                  |         |

**Table S2.** The main volatile compounds in simulated groundwater samples 1 and 2.

| Simulated groundwater sample 1 |                           |                               | Simulated groundwater sample 2 |
|--------------------------------|---------------------------|-------------------------------|--------------------------------|
| Toluene                        | Benzophenone              | Butyl ether                   | Nonanal                        |
| Nonanal                        | Texanol isobutyrate       | 2-(4-Phenoxyphenyl)indolizine | Decanal                        |
| Decanal                        | Isobutyraldehyde trimer   |                               | Dibutyl phthalate              |
| 2-Ethylhexanol                 | 1,2-Cyclohexanediol       |                               | Diisobutyl phthalate           |
| Dibutyl phthalate              | Butyl Oxitol glycol ether |                               | 1,2-Cyclohexanediol            |

**Table S3.** Properties of gas sensors chosen in the e-nose system.

| Serial number | sensor model | sensor sensitivity                                                               | Sensitivity  |
|---------------|--------------|----------------------------------------------------------------------------------|--------------|
| S1            | TGS2600      | alcohol, H <sub>2</sub>                                                          | 1-30ppm      |
| S2            | TGS2602      | VOCs, hydrogen sulfide, ammonia                                                  | 1-30ppm      |
| S3            | TGS2603      | air pollutant                                                                    | 1-10ppm      |
| S4            | TGS2610      | LP gas                                                                           | 500-10000ppm |
| S5            | TGS2611      | CH <sub>4</sub>                                                                  | 500-10000ppm |
| S6            | TGS2612      | CH <sub>4</sub> , C <sub>3</sub> H <sub>8</sub> , C <sub>4</sub> H <sub>10</sub> | 400-1000ppm  |
| S7            | TGS2618      | C <sub>4</sub> H <sub>10</sub> , LP gas                                          | 500-10000ppm |
| S8            | TGS2620      | ethanol, organic solvent                                                         | 50-5000ppm   |
| S9            | GSBT11       | toluene, formaldehyde, benzene                                                   | 0.1-10ppm    |
| S10           | MS1100       | VOCs, organic compounds, smoke                                                   | 5-1000ppm    |
| S11           | MP-2         | C <sub>3</sub> H <sub>8</sub> , smoke                                            | 200-10000ppm |
| S12           | MP-4         | CH <sub>4</sub> , natural gas, biogas                                            | 300-10000ppm |
| S13           | MP-5         | liquefied petroleum gas                                                          | 300-10000ppm |
| S14           | MP-7         | CO                                                                               | 50-1000ppm   |
| S15           | MP-9         | CO, CH <sub>4</sub>                                                              | 50-1000ppm   |
| S16           | MP-3B        | alcohol                                                                          | 0-500ppm     |
| S17           | MP135        | H <sub>2</sub> , alcohol, CO                                                     | 10-500ppm    |
| S18           | MP402        | CH <sub>4</sub> , natural gas, biogas                                            | 300-10000ppm |
| S19           | MP503        | alcohol, smoke, C <sub>4</sub> H <sub>10</sub> , formaldehyde                    | 1-1000ppm    |
| S20           | MP702        | NH <sub>3</sub>                                                                  | 0-100ppm     |
| S21           | MP801        | benzene, toluene, formaldehyde, alcohol, smoke                                   | 0.5-1000ppm  |
| S22           | MP901        | benzene, acetone, lighter gas, paint                                             | 10-1000ppm   |
| S23           | MP905        | benzene, toluene, formaldehyde, lighter gas                                      | 0.5-1000ppm  |
| S24           | WSP1110      | NO <sub>2</sub>                                                                  | 0.1-10ppm    |
| S25           | WSP2110      | toluene, formaldehyde, benzene, alcohol, acetone                                 | 1-50ppm      |
| S26           | WSP7110      | hydrogen sulfide, acetylene, benzene                                             | 0-50ppm      |
